# Supplementary material for: Barley endosomal MONENSIN SENSITIVITY1 is a target of the powdery mildew effector CSEP0162 and plays a role in plant immunity
Source: PubMed Central journal article supplement (PMC9786837; doi:10.1093/jxb/erac403), 2022-10-13
Supplement: erac403_suppl_supplementary_figures_s1-s3_tables_s1-s3.pdf [file erac403_suppl_supplementary_figures_s1-s3_tables_s1-s3.pdf]

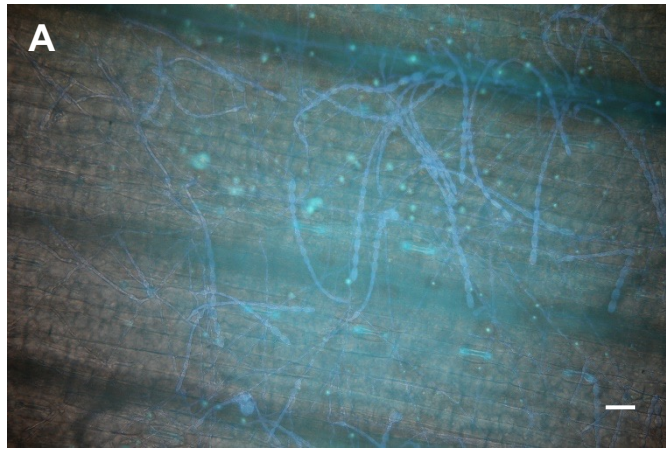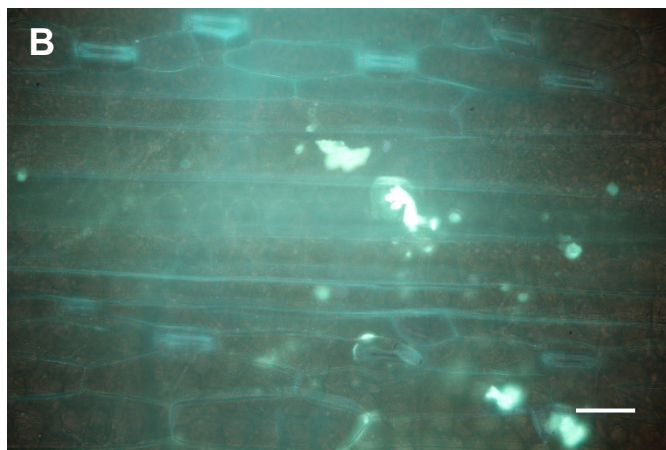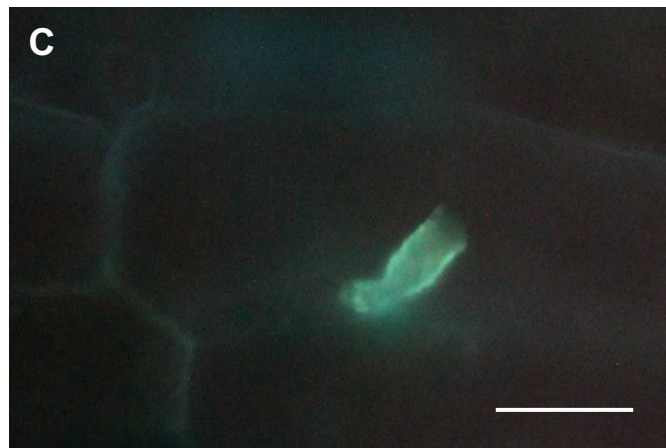

**Supplementary Figure S1. Callose-containing encasements around *Bh* haustoria in barley induced by tetraconazole. (A) *Bh* colony and conidia chains developed on barley 4 days after inoculation. (B,C) Tetraconazole-induced encasements around *Bh* haustoria in barley epidermal cells. Inoculation was made 2 h after treatment. Images taken 4 dpi. UV-fluorescence microscopy after aniline blue treatment. Size bars, 100  $\mu\text{m}$  in A and B, 10  $\mu\text{m}$  in C.**

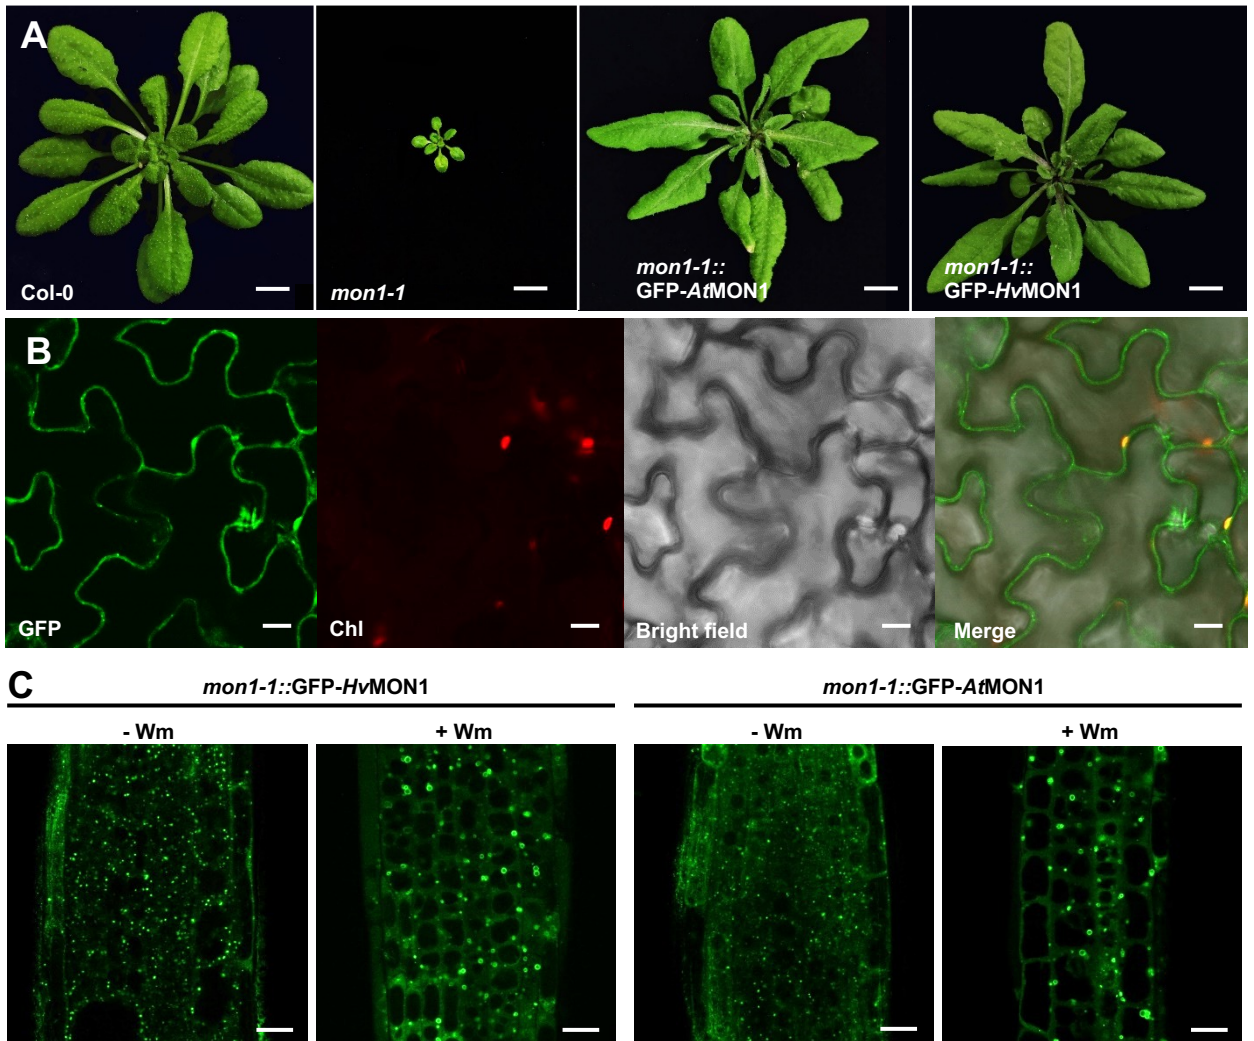

**Supplementary Figure S2. Barley *HvMON1* complements the function of Arabidopsis *AtMON1*.** (A) Transformation of Col-0 *mon1-1* with *35S::HvMON1* rescues it from its lethality phenotype. Size bars, 1 cm, (B) CSLM subcellular localization of GFP-*HvMON1* expressed in *mon1-1* leaf cells epidermal. (C) Wortmannin-induced ring-shaped structures of GFP-*HvMON1* and GFP-*AtMON1* resolved by CSLM. Roots were treated with 33  $\mu$ M wortmannin for 1 hour. Size bars, 10  $\mu$ m in B and 10  $\mu$ m C.

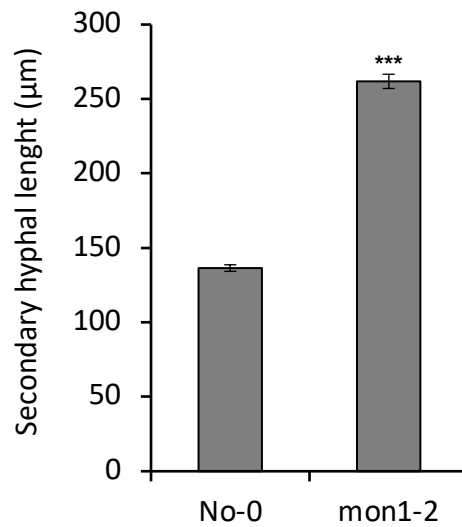

**Supplementary Figure S3. Secondary hyphal length of *Go* on No-0 and *mon1-2*.** Length of secondary hyphae developed from penetrated appressoria at 2 days after inoculation. Error bars, SE. \*\*\*,  $P < 0.001$  assessed by Student's T-tests.  $n=3$ .

**Supplementary Table S1. Primers used in this work.**

| Name            | Information                                 | Sequence (5'-3')                           |
|-----------------|---------------------------------------------|--------------------------------------------|
| attbHvMON1-F    | HvMON1                                      | AAAAAAGCAGGCTACATGGATCCGGCCCCCGAT          |
| attbHvMON1-R    | Cloning                                     | AGAAAGCTGGGTCTCACCAGGCAATGGTGCT            |
| attBCSEP0162-F  | CSEP0162                                    | AAAAAAGCAGGCTACATGGCCCAATATTCTAGACATATTTAA |
| attBCSEP0162-R  | Cloning                                     | AGAAAGCTGGGTCTCCCGAGCCAAGTGGC              |
| attbAtMON1-F    | AtMON1 Cloning                              | AAAAAAGCAGGCTACATGGCGACTTCAGATTCCG         |
| attbAtMON1-R    |                                             | AGAAAGCTGGGTCTCACCAGGCAATGGTGCT            |
| pGB9-FP         | pDEST-AS2-1 sequencing                      | AGTGCACATCATCATCG                          |
| pGB9-RP         |                                             | CGTTTTAAAACCTAAGAGTCAC                     |
| pACT2-FP        | pDEST-ACT2 sequencing                       | GATGATGAAGATACCCAC                         |
| pACT2-RP        |                                             | CAGTTGAAGTGAAGTGC                          |
| attbHvMON1i-F   | HvMON1 RNAi                                 | AAAAAAGCAGGCTACCACCACTTCTAGGTGGCACA        |
| attbHvMON1i-R   | Cloning                                     | AGAAAGCTGGGTCTCGCAAGCATATGGGTGAAAA         |
| qRT-VIGS-Mi-F1  | qRT-PCR for HvMON1 RNAi                     | CCGCACAAAACACAATTGAG                       |
| qRT-VIGS-Mi-R1  |                                             | CCCTGATCCACTGGCATACT                       |
| HvUBC2-F        |                                             | GGATCCAGGGGCACCTCAC                        |
| HvUBC2-R        |                                             | CGTCCAAGCTTTTGGAGGAC                       |
| Bgh-GPD-F       |                                             | <i>Blumeria hordei</i> quantification      |
| Bgh-GPD-R       | CATTTCCGGCGGCAATCTTT                        |                                            |
| qPCR-HvM-F      | TTCTGATGAGGCAATTGGTG                        |                                            |
| qPCR-HvM-R      | TTCTTATGGGCAAGGCAAAC                        |                                            |
| BS10            | VIGS vector sequencing                      | GGTGCTTGATGCTTTGGATAAAGG                   |
| BS32            |                                             | TGGTCTTCCCTTGGGGGAC                        |
| At3g21215-RBD-F | <i>Golovinomyces orontii</i> quantification | GAATCCACCCATACCACCAG                       |
| At3g21215-RBD-R |                                             | GAGGAGGAGGATGGTGATGA                       |
| GoATPase1-F     |                                             | TCGCCGCTATATTGGAGTC                        |
| GoATPase1-R     |                                             | CTGGGTCAGATGGTTCACCT                       |
| mon1-mutant-LP  | mon1 mutant                                 | CGGTTTGCTGAGTTACTCAG                       |
| mon1-mutant-RP  |                                             | AAAAGCCCAACAATATGGGTC                      |
| DS5-3           | <i>mon1-2</i> (No-0)                        | TACCTCGGGTTCGAAATCGAT                      |
| LBb1.3          | <i>mon1-1</i> (Col-0)                       | ATTTTGCCGATTCGGAAC                         |
| eds1-F760       | <i>eds1-2</i> mutant                        | ACACAAGGGTGATGCGAGACA                      |
| eds1-R1458      |                                             | GGCTTGATTCATCTTCTATCC                      |
| eds1-R2333      |                                             | GTGGAAACCAAAATTTGACATTAG                   |
| ndr1-F3129      | <i>ndr1-1</i> mutant                        | GGTTGTGAAATCAAGAATTAATGTGGA                |
| ndr1-F4443      |                                             | TTGCCTAATGGATCGGCTG                        |
| ndr1-R4928      |                                             | GTTCTTGATTTGAAACCAACA                      |

**Supplementary Table S2. Gateway destination vectors used in this work.**

| Name                                | Information                                        | Reference                                                             |
|-------------------------------------|----------------------------------------------------|-----------------------------------------------------------------------|
| <b>pDEST-ACT2-GW</b>                | Yeast two-hybrid                                   | Robertson. 2004                                                       |
| <b>pDEST-AS2-GW</b>                 |                                                    |                                                                       |
| <b>pB4GWnG</b>                      | BiFC                                               | Kamigaki et al. 2016                                                  |
| <b>pB4GWcCG</b>                     |                                                    |                                                                       |
| <b>pB4nGGW</b>                      |                                                    |                                                                       |
| <b>pB4cCGGW</b>                     |                                                    |                                                                       |
| <b>p35S-mCherry-GW</b>              | Protoplast transformation and particle bombardment | Kwaaitaal et al. 2010                                                 |
| <b>pUbi-GW-YFP</b>                  |                                                    |                                                                       |
| <b>pUbi-GW-nos</b>                  |                                                    |                                                                       |
| <b>pIPKTA30N-GW</b>                 |                                                    |                                                                       |
| <b>pCaBS-<math>\gamma</math>-GW</b> | VIGS                                               | pCaBS- $\gamma$ (Yuan et al. 2011) were adapted to Gateway compatible |
| <b>pUBN10-GFP-GW</b>                | Arabidopsis overexpression                         | Grefen et al. 2010                                                    |

## References

- Grefen C, Donald N, Hashimoto K, Kudla J, Schumacher K, Blatt MR** 2010). A ubiquitin-10 promoter-based vector set for fluorescent protein tagging facilitates temporal stability and native protein distribution in transient and stable expression studies. *Plant Journal* 64: 355–365
- Kamigaki A, Nito K, Hikino K, Goto-Yamada S, Nishimura M, Nakagawa T, Mano S.** 2016. Gateway vectors for simultaneous detection of multiple protein–protein interactions in plant cells using bimolecular fluorescence complementation. *PLoS One* 11, e0160717.
- Kwaaitaal M, Keinath NF, Pajonk S, Biskup C, Panstruga R.** 2010. Combined bimolecular fluorescence complementation and Förster resonance energy transfer reveals ternary SNARE complex formation in living plant cells. *Plant Physiology* 152, 1135–1147.
- Nowara D, Gay A, Lacomme C, Shaw J, Ridout C, Douchkov D, Hensel G, Kumlehn J, Schweizer P.** 2010. HIGS: host-induced gene silencing in the obligate biotrophic fungal pathogen *Blumeria graminis*. *The Plant Cell* 22, 3130–3141.
- Robertson M.** 2004. Two transcription factors are negative regulators of gibberellin response in the HvSPY-signaling pathway in barley aleurone. *Plant Physiology* 136, 2747–2761.
- Yuan C, Li C, Yan L, Jackson AO, Liu Z, Han C, Yu J, Li D.** 2011. A high throughput barley stripe mosaic virus vector for virus induced gene silencing in monocots and dicots. *PLoS ONE* 6, e26468.

**Supplementary Table S3. Overview of *HvMON1*/CSEP0162 bifluorescence complementation (BiFC) results.**

| Combination                         | Fluorescence signal |
|-------------------------------------|---------------------|
| <i>HvMON1</i> -nGFP + CSEP0162-cCFP | No                  |
| <i>HvMON1</i> -nGFP + cCFP-CSEP0162 | No                  |
| nGFP- <i>HvMON1</i> + cCFP-CSEP0162 | No                  |
| nGFP- <i>HvMON1</i> + CSEP0162-cCFP | Yes                 |
| <i>HvMON1</i> -cCFP + CSEP0162-nGFP | No                  |
| <i>HvMON1</i> -cCFP + nGFP-CSEP0162 | No                  |
| cCFP- <i>HvMON1</i> + nGFP-CSEP0162 | No                  |
| cCFP- <i>HvMON1</i> + CSEP0162-nGFP | No                  |
